# Supplementary material for: Partial eNOS deficiency causes spontaneous thrombotic cerebral infarction, amyloid angiopathy and cognitive impairment
Source: Springer Nature journal article supplement (doi:10.1186/s13024-015-0020-0), 2015-06-23

# Online Figure 1

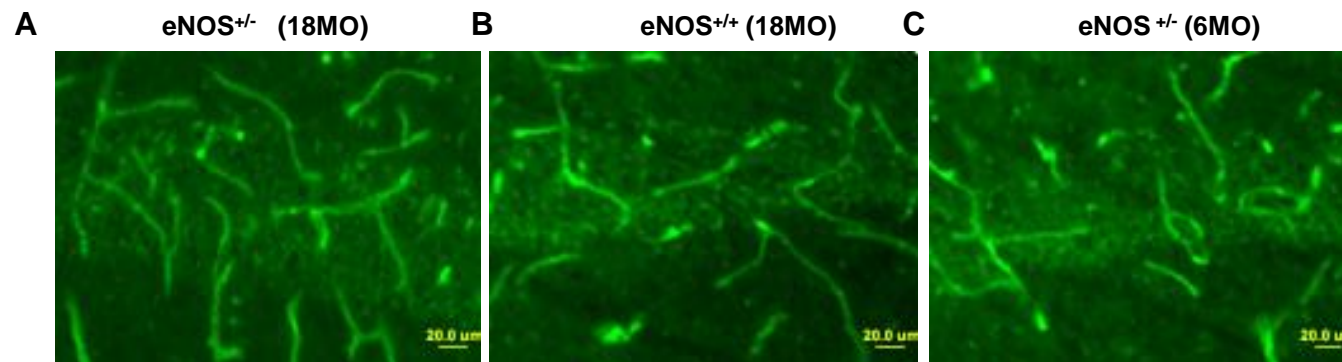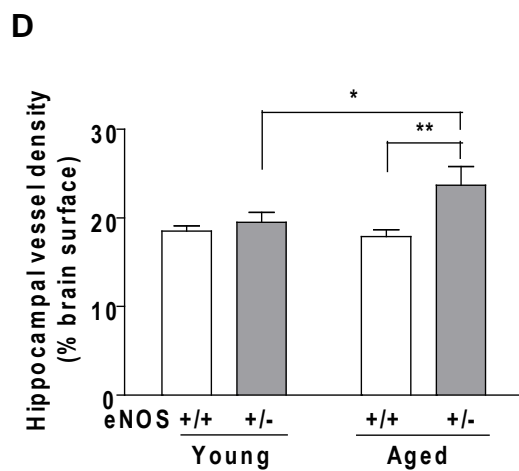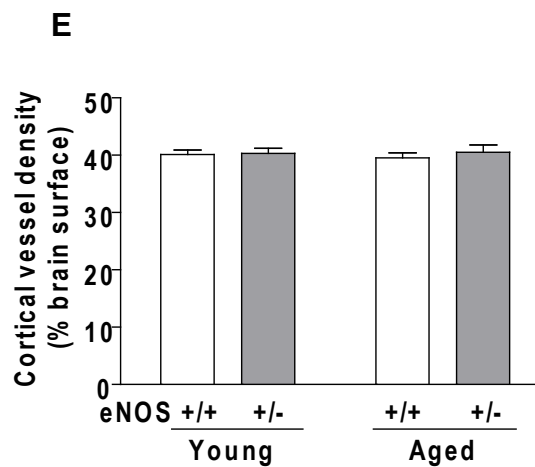

Online Figure 2

Parietal Cortex (mouse IgG)

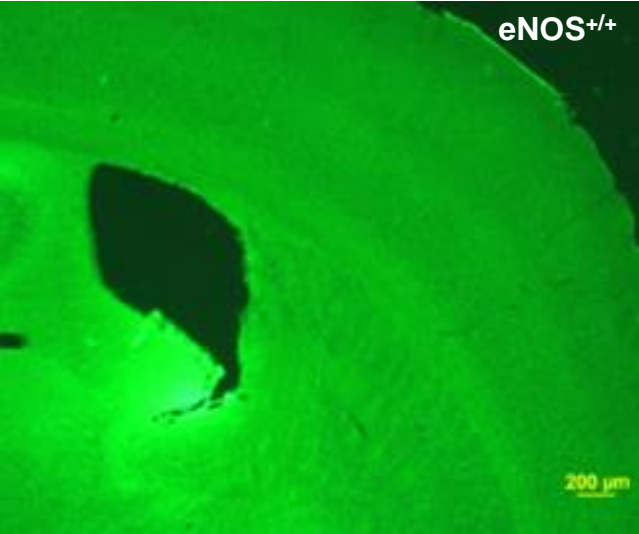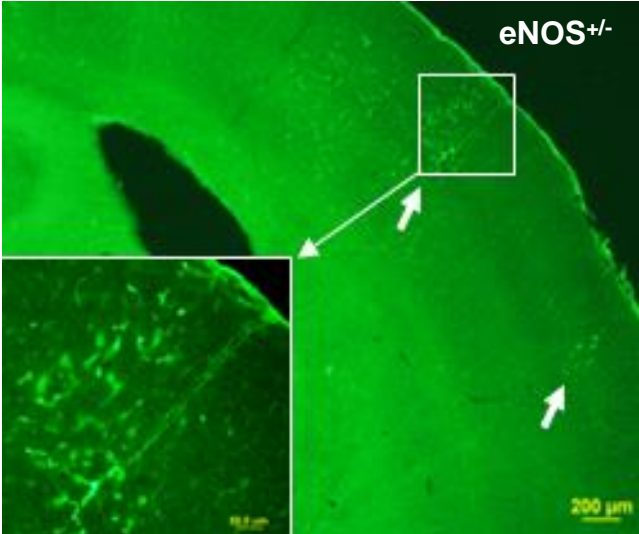

Online Figure 3

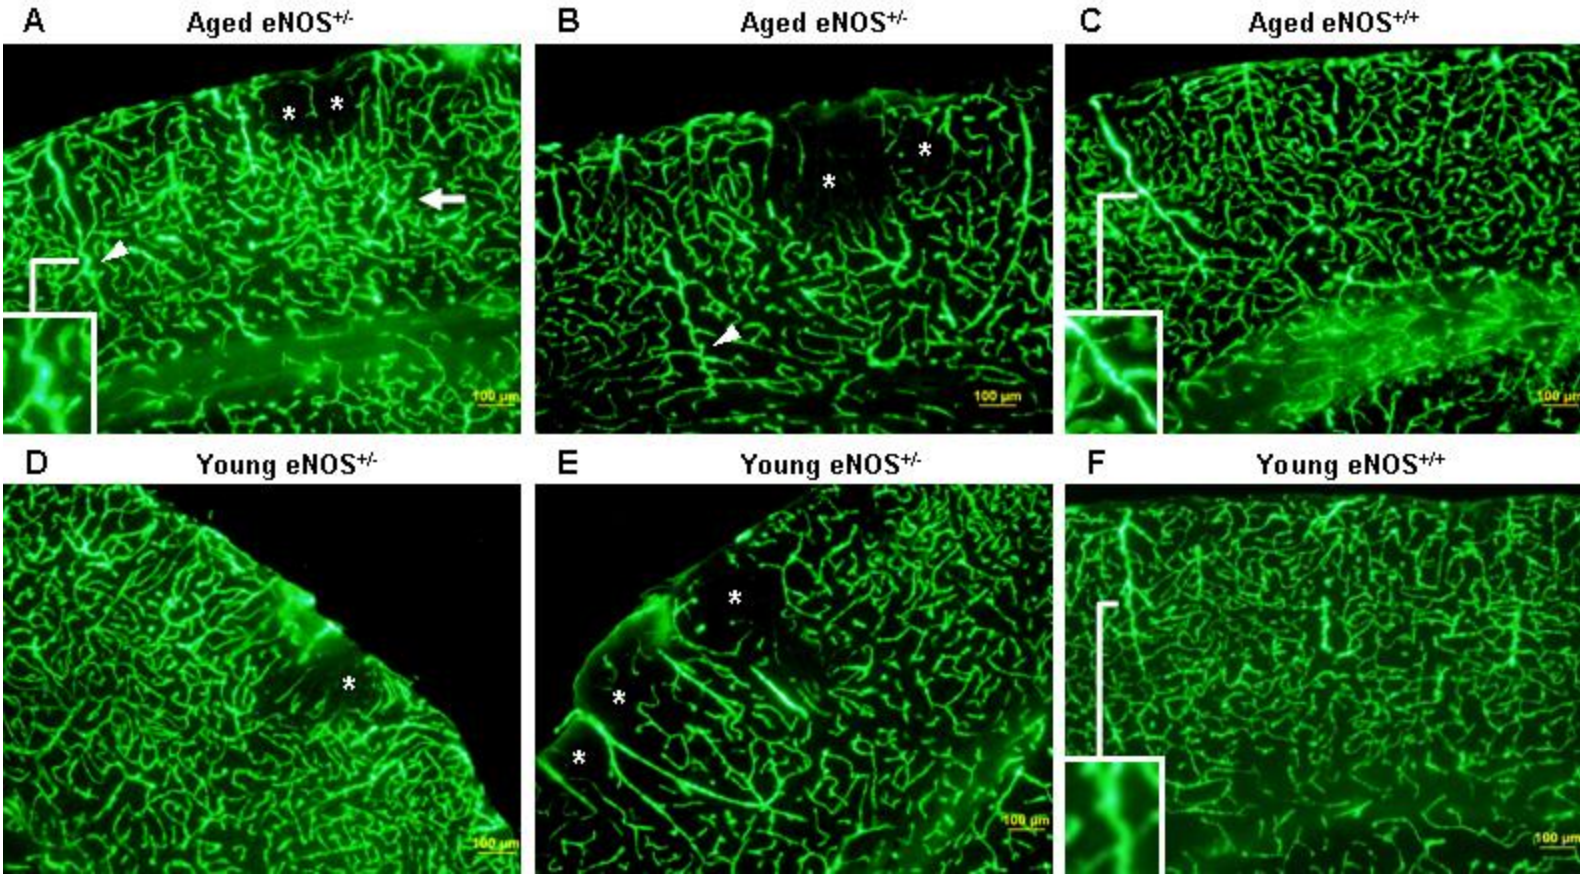

Supplement: MOESM1 [file 9776438]
